# Supplementary material for: Allelic haplotype combinations at the MS-P1 region, including P-class pentatricopeptide repeat family genes, influence wide phenotypic variation in pollen grain number through a cytoplasmic male sterility model in citrus
Source: Front Plant Sci. 2023 Jun 5;14:1163358. doi: 10.3389/fpls.2023.1163358 (PMC10278581; doi:10.3389/fpls.2023.1163358)
Supplement: Supplementary file 5 [file Table_2.xlsx]

## Sheet: Table S3
Table S2 Varieties and selected strains used in this study.
Code	Name	Scientific name / Parental combination	Accession ID	Type	Reference
1	Dancy tangerine	Citrus tangerina hort. ex Tanaka	117396	Founder / Indigenous variety	[1]
2	Grapefruit (cv. Red blush)	C. paradisi Macfad.	117298	Founder / Indigenous variety	[1]
3	Hassaku	C. hassaku hort. ex Tanaka	117286	Founder / Indigenous variety	[1]
4	Hyuganatsu	C. tamurana hort. ex Tanaka	117317	Founder / Indigenous variety	[1]
5	Iyo (cv. Miyauchi)	C. iyo hort. ex Tanaka	117374	Founder / Indigenous variety	[1]
6	King	C. nobilis Lour.	117386	Founder / Indigenous variety	[1]
7	Kishu mandarin (cv. Kishu)	C. kinokuni hort. ex Tanaka	171490	Founder / Indigenous variety	[1]
8	Kunenbo	C. nobilis Lour. var. kunep Tanaka	117387	Founder / Indigenous variety	[1]
9	Ponkan (cv. Yoshida)	C. reticulata Blanco	113178	Founder / Indigenous variety	[1]
10	Sweet orange (cv. Trovita)	C. sinensis (L.) Osbeck	172154	Founder / Indigenous variety	[1]
11	Willowleaf mandarin	C. deliciosa Ten.	117393	Founder / Indigenous variety	[1]
12	Murcott	C. sp	N/A	Founder / Hybrid variety	[1]
13	Clementine	C. clementina hort. ex Tanaka / Willowleaf mandarin × Sweet orange	N/A	Natural hybrid variety between founders	[1]
14	Satsuma mandarin (original tree)	C. unshiu Marcov. / Kishu × Kunenbo	168849	Natural hybrid variety between founders	[1]
15	Satsuma mandarin (cv. Aoshima)	C. unshiu Marcov. / Kishu × Kunenbo	117320	Bud variant of Satsuma mandarin	[1]
16	Satsuma mandarin (cv. Miyagawa-Wase)	C. unshiu Marcov. / Kishu × Kunenbo	117351	Bud variant of Satsuma mandarin	[1]
17	Satsuma mandarin (cv. Miho-Wase)	C. unshiu Marcov. / Kishu × Kunenbo	170631	nucellar seedling of Satsuma mandarin	[1]
18	Satsuma mandarin (cv. Okitsu-Wase)	C. unshiu Marcov. / Kishu × Kunenbo	170630	nucellar seedling of Satsuma mandarin	[1]
19	Akemi	Kiyomi × Seminole	N/A	Hybrid variety	[1]
20	Amaka	Kiyomi × Encore	N/A	Hybrid variety	[1]
21	Amakusa	KyOw14 × Page	N/A	Hybrid variety	[2]
22	Ariake	Sweet orange × Clementine	N/A	Hybrid variety	[1]
23	Asuki	Okitsu No. 46 × Harumi	N/A	Hybrid variety	Strain 71 in [1]
24	Asumi	Okitsu No. 46 × Harumi	N/A	Hybrid variety	[1]
25	Awa orange	Hyuganatsu × Sweet orange	N/A	Hybrid variety	[1]
26	Benibae	HF9 × Encore	N/A	Hybrid variety	[1]
27	Ehime Kashi No. 28	Nankou × Amakusa	N/A	Hybrid variety	[1]
28	Encore	King × Willowleaf mandarin	117421	Hybrid variety	[1]
29	Harehime	E-647 × Satsuma mandarin	N/A	Hybrid variety	[1]
30	Haruhi	Okitsu No. 46 × Awa orange	N/A	Hybrid variety	[1]
31	Harumi	Kiyomi × Ponkan	N/A	Hybrid variety	[1]
32	Hayaka	Satsuma mandarin × Ponkan	N/A	Hybrid variety	[1]
33	Kanpei	Nishinokaori × Ponkan	N/A	Hybrid variety	[1]
34	Kara	Satsuma mandarin × King	117422	Hybrid variety	[1]
35	Kiyomi	Satsuma mandarin × Sweet orange	115521	Hybrid variety	[1]
36	Mihaya	Tsunonozomi × No. 1408	N/A	Hybrid variety	[1]
37	Miho-core	Satsuma mandarin × Encore	N/A	Hybrid variety	[1]
38	Mineola	Grapefruit × Dacy tangerine	113377	Hybrid variety	[1]
39	Nankou	Satsuma mandarin × Clementine	N/A	Hybrid variety	[1]
40	Nishinokaori	Kiyomi × Sweet orange	N/A	Hybrid variety	[1]
41	Nou 5 gou	Lee × Kishu mandarin	N/A	Hybrid variety	[1]
42	Orland	Grapefruit × Dacy tangerine	113327	Hybrid variety	[1]
43	Osceola	Clementine × Orland	113329	Hybrid variety	[1]
44	Page	Mineola × Clementine	N/A	Hybrid variety	[1]
45	Robinson	Clementine × Orland	N/A	Hybrid variety	[1]
46	Seihou	Kiyomi × Mineola	N/A	Hybrid variety	[1]
47	Seinannohikari	EnOw21 × Youkou	N/A	Hybrid variety	[1]
48	Seminole	Grapefruit × Dacy tangerine	113348	Hybrid variety	[1]
49	Setoka	KyEn4 (Kiyomi × Encore) × Murcott	N/A	Hybrid variety	[2]
50	Shiranuhi	Kiyomi × Ponkan	N/A	Hybrid variety	[1]
51	Sweet Spring	Satsuma mandarin × Hassaku	168866	Hybrid variety	[1]
52	Tamami	Kiyomi × Willking	N/A	Hybrid variety	[1]
53	Tsunokagayaki	KyOw14 × Encore	N/A	Hybrid variety	[1]
54	Tsunokaori	Kiyomi × Satsuma mandarin	N/A	Hybrid variety	[1]
55	Tsunonozomi	Kiyomi × Encore	N/A	Hybrid variety	[1]
56	Willking	King × Willowleaf mandarin	117425	Hybrid variety	[1]
57	Youkou	Kiyomi × Ponkan	N/A	Hybrid variety	[1]
58	E-647	Kiyomi × Osceola	N/A	Selected strain	[1]
59	EnOw21	Encore × Satsuma mandarin	N/A	Selected strain	[1]
60	F-202	Kiyomi × Willking	N/A	Selected strain	Strain 11 in [1]
61	G-1082	Kiyomi × Okitsu No. 41 (Kiyomi × Willking)	N/A	Selected strain	Strain 12 in [1]
62	HF9	Satsuma mandarin × Sweet orange	N/A	Selected strain	[1]
63	Kuchinotsu No. 18	KyOw21 × Encore	N/A	Selected strain	[3]
64	Kuchinotsu No. 33	KyOw14 × Encore	N/A	Selected strain	[3]
65	Kuchinotsu No. 44	Sweet Spring × Ariake	N/A	Selected strain	In this study
66	KyOw14	Kiyomi × Satsuma mandarin	N/A	Selected strain	[1]
67	KyOw21	Kiyomi × Satsuma mandarin	N/A	Selected strain	[1]
68	No. 1011	Nankou × 2700·Iyo-25 (Kiyomi × Iyo)	N/A	Selected strain	[3]
69	No. 1408	EnOw21 × No. 2681 (Kiyomi × Iyo)	N/A	Selected strain	[1]
70	Okitsu No. 37	Sweet Spring × Hassaku	N/A	Selected strain	Strain 59 in [1]
71	Okitsu No. 45	Kiyomi × Willking	N/A	Selected strain	Strain 65 in [1]
72	Okitsu No. 46	Sweet Spring × Sweet orange	N/A	Selected strain	[1]
73	Okitsu No. 52	A7 (Sweet Spring × Sweet orange) × Satsuma mandarin	N/A	Selected strain	Strain 67 in [1]
74	Okitsu No. 56	Okitsu No. 45 × Nou 5 gou	N/A	Selected strain	[1]
75	Okitsu No. 63	E-647 × Ponkan	N/A	Selected strain	[3]
76	Okitsu No.67	Harehime × Okitsu No. 56	N/A	Selected strain	[3]
77	Strain 86	Kanpei × Satsuma mandarin	N/A	Selected strain	In this study
78	Strain 87	Ehimekashi No. 28 × Hyuganatsu	N/A	Selected strain	In this study
79	Strain 88	Harehime × King	N/A	Selected strain	In this study
80	Strain 89	Asuki × Hyuganatsu	N/A	Selected strain	In this study
81	Strain 90	Ehime Kashi No. 28 × Seinannohikari	N/A	Selected strain	In this study
82	Strain 91	Tsunokagayaki × Amakusa	N/A	Selected strain	In this study
83	Strain 92	No. 1011 × Asumi	N/A	Selected strain	In this study
84	Strain 93	HF9 × Benibae	N/A	Selected strain	In this study
85	Strain 94	Okitsu No. 62 (Harehime × Okitsu No. 56) × Shiranuhi	N/A	Selected strain	In this study
	Accession ID: JP numbers in NARO Genebank (http://www.gene.affrc.go.jp/index_en.php)
	N/A: not available in NARO Genebank
	Reference
	1. Shimizu T, Kitajima A, Nonaka K et al. Hybrid origins of citrus varieties inferred from DNA marker analysis of nuclear and organelle genomes. PLoS One 2016; 11 :e0166969.
	2. Nonaka K, Fujii H, Kita M, et al. Identification and paretenatage analysis of citrus cultivars developed in Japan by CAPS markers. Horticult J 2017; 86: 208–21.
	3. Minamikawa MF, Nonaka K, Hamada H et al. Dissecting breeders’ sense via explainable machine learning approach: application to fruit peelability and hardness in citrus. Front Plant Sci 2022; 13: 832749.
