# Supplementary material for: Allelic haplotype combinations at the MS-P1 region, including P-class pentatricopeptide repeat family genes, influence wide phenotypic variation in pollen grain number through a cytoplasmic male sterility model in citrus
Source: Front Plant Sci. 2023 Jun 5;14:1163358. doi: 10.3389/fpls.2023.1163358 (PMC10278581; doi:10.3389/fpls.2023.1163358)
Supplement: Supplementary file 6 [file Table_3.xlsx]

## Sheet: Table S1
Table S3 DNA markers used in this study
Marker No.	Marker name	Tag	Tagged forward primer	tail	Tailed reverse primer	Scaffolds in Clementine genome	SSR start position in the Scaffold in Clementine genome	Scaffolds in Satsuma genome	SSR start position in the each Scaffold in Satsuma genome	Motif sequence	Repeat Number in MiDB	Product size in MiDB	Refrence
1	TSRF161*	F9GAC	ctagtatcaggacgacGCTTGAAATGGCAACAAGACC	gtttctt	gtttcttGGCAACAATCTTTCCCAAGTC	Scaffold 8	5153708	C_unshiu_00362	17426	AGC	9	235	[1]
2	00362-1*	F9AGG	ctagtattaggacaggCCGGACATGGATGTAATCA	gtttctt	gtttcttGGATCAGCAGAAGAGGGAGAC	Scaffold 8	5,154,364	C_unshiu_00362	16,851	TGT	10	175	in this study
3	00511-1*	F9AGG	ctagtatcaggacaggAAGCGGGAACAAAGAAGGAC	gtttctt	gtttcttCTTCTCAATGCCCAGCTCTC	Scaffold 8	5,329,309	C_unshiu_00511	96,084	ATA	15	322	in this study
4	00791-1*	F9GTC	ctagtatgaggacgtcATCCGAGCATCTTGCTTCTT	gtttctt	gtttcttGATTTTGGAAGTGGGTTTTGAG	Scaffold 8	5,718,364	C_unshiu_00791	121,894	TC	16	165	in this study
5	00220-1*	F9GTC	ctagtatgaggacgtcTTTGCCTATGCAGCGTGTTC	gtttc	gtttcTTGCTTGTGACCAACCAAGTG	Scaffold 8	6,071,503	C_unshiu_00220	94,416	AC	9	279	in this study
6	00220-2*	F9TAC	ctagtatcaggactacCATGACAGGGCTTGATATTGG	gtttct	gtttctTGATTTTAACCAGCGGCAAC	Scaffold 8	6,184,904	C_unshiu_00220	190,854	AG	9	231	in this study
7	00918-1*#	F9TAC	ctagtatcaggactacTCAGTCGCTAGCCAAGGAACA	gtttctt	gtttcttGGCTGAGATGGTTTGGGTTGC	Scaffold 8	6,940,533	C_unshiu_00918	109,696	CA	10	243	in this study
8	00432-1*	F9AGG	ctagtattaggacaggCGAAAGGACTTCCACAATTCA	gtttctt	gtttcttGGCGAGTCCGTTATGGTTC	Scaffold 8	7,104,658	C_unshiu_00432	92,002	AAT	12	148	in this study
9	NSX132*	F9GCC	ctagtattaggacgccGATGTTGGTTGCTCATTCAATGG	gtttctt	gtttcttTGGCTGCATTGCTTTAAGTTAGAG	Scaffold 8	7,324,108 7,324,155	C_unshiu_02172	14,702 14,741	CAATCAC TA	2 4	134	[1]
10	02172-1*	F9GCC	ctagtattaggacgccAAACATAGACACATGGCAAACA	gtttctt	gtttcttGGTGAAAATAGTCCCCCTCA	Scaffold 8	7,325,579	C_unshiu_02172	16,160	TA	7	337	in this study
11	00616-1*	F9GTC	ctagtatgaggacgtcACCGTTTCGACAAACCACGC	gtttctt	gtttcttGGTGGAACCCCTTCGTCGAA	Scaffold 8	8,153,794	C_unshiu_00616	31,379	AG	10	248	in this study
12	NSX137*	F9TAC	ctagtatcaggactacCCTCCAAGCATACTACCACC	gtttctt	gtttcttGGTTCTGATGCTGCTTTGTTA	Scaffold 8	8,779,699	C_unshiu_00329	147,653	GAGCAG	2	104	[1]
13	CiBE4121*	F9AGG	ctagtattaggacaggGTATCCAAGAAAGGAAGGAAA	gtttctt	gtttcttCGTGTCAGTGTGAAATAGACC	Scaffold 8	13,210,911	C_unshiu_01736	35,905	GAAAA	2	275	[2]
14	01072-1*	F9AGG	ctagtattaggacaggACCCCAGCTCACCTTCCAAA	gtttctt	gtttcttCGCACACACACTTGCACACA	Scaffold 8	13,540,737	C_unshiu_01072	11,111	GT	27	182	in this study
15	NSX161*	F9GCC	ctagtattaggacgccAGAAATCCAAGTAATTGAGTGTTTAT	gtttctt	gtttcttATCCACAAATTACCCTACATCCT	Scaffold 8	13,549,902†	C_unshiu_01072	20,329†	AATTGGATT/ AATTGGATTTAAGGATTGGATT	Indel	91	[1]
16	00783-1*	F9GTC	ctagtatgaggacgtcGGTCAGTGTGGGAGTCTGGG	gtttctt	gtttcttACCCGAAAAAGACAGCCAAATCC	Scaffold 8	15,058,870	C_unshiu_00783	68,282	AC	18	239	in this study
17	00225-1*	F9GCC	ctagtattaggacgccTGCCAGGGAAGAAGAAGTGGA	gtttctt	gtttcttGTGCATACATGAGGGCACGC	Scaffold 8	17,781,429	C_unshiu_00225	270,495	TC	11	156	in this study
18	00251-1*	F9TAC	ctagtatcaggactacTGCTTCGAGGGCTTTGGAGA	gtttctt	gtttcttAGAAGAAAAGCAAAACCCAACTTGC	Scaffold 8	18,000,562	C_unshiu_00251	54,751	AG	14	250	in this study
19	SSR08B66*	F9GAC	ctagtatgaggacgtcAGAGACAAATCAACCGAC	gttt	gtttAAGCACAACAATCTTCCTC	Scaffold 8	19761190	C_unshiu_00011	189141	CGA	6	87	[1]
20	00918-2#	F9TAC	ctagtatcaggactacTCCTCCACTTGCCACCAACA	gtttct	gtttctTGCCCCCACTATCTTGCTGA	Scaffold 8	6,898,163	C_unshiu_00918	67,663	AG	12	199	in this study
21	00918-3#	F9GCC	ctagtattaggacgccAAGCACACTGTACCCACATTGA	gtttctt	gtttcttGGTGGATACATTCATGTTATTGTGAAG	Scaffold 8	6,887,561	C_unshiu_00918	56,808	CT	8	202	in this study
Clementin genome: genome data base of Citrus clementina v1.0 was refered (https://phytozome-next.jgi.doe.gov/info/Cclementina_v1_0).
Satsuma mandarin genome: genome data base of Satsuma mandarin in Mikan Genome DB was refered (https://mikan.dna.affrc.go.jp/).
"Tag" column indicates kinds of BStag sequence and the small lettes of nucleotide sequence in "Tagged forward primer" column show BStag sequence [3].
*: for fine mapping. #: for haplotyping at MS-P1 reagion. †: Indel start position.
Reference
1. Shimizu T, Kitajima A, Nonaka K et al. Hybrid origins of citrus varieties inferred from DNA marker analysis of nuclear and organelle genomes. PLoS One 2016; 11: e0166969.
2. Ollitrault F, Terol J, Pina JA et al. Development of SSR markers from Citrus clementina (Rutaceae) BAC end sequences and interspecific transferability in Citrus. Am J Bot 2010; 97: e124–9.
3. Shimizu T, Yano K. A post-labeling method for multiplexed and multicolored genotyping analysis of SSR, indel and SNP markers in single tube with bar-coded split tag (BStag). BMC Res Notes 2011; 4: 161.
