# Supplementary material for: Allelic haplotype combinations at the MS-P1 region, including P-class pentatricopeptide repeat family genes, influence wide phenotypic variation in pollen grain number through a cytoplasmic male sterility model in citrus
Source: Front Plant Sci. 2023 Jun 5;14:1163358. doi: 10.3389/fpls.2023.1163358 (PMC10278581; doi:10.3389/fpls.2023.1163358)
Supplement: Supplementary file 9 [file Table_6.xlsx]

## Sheet: Table S6
Table S6 Genetic data and the number of pollen grains per anther in varieties and selected strains
A Varieties and selected strains
Code	Name	Genotype of 00918-1	Genotype of 00918-2	Genotype of 00918-3	Haplotype 1	Haplotype 2	Founder which the cytoplasm is deirved from	The number of pollen grains per anther
								2017	2018
1	Dancy tangerine	248/248	234/234	221/221	HT6	HT6	Dancy	†
2	Grapefruit (cv. Red blush)	248/260	234/238	221/223	HT1	HT3	Grapefruit	†
3	Hassaku	248/260	224/238	223/223	HT1	HT9	Hassaku	†
4	Hyuganatsu	260/272	232/238	223/225	HT1	HT8	Hyuganatsu	†
5	Iyo (cv. Miyauchi)	248/256	191/234	221/221	HT6	HT11	Iyo	†
6	King	248/260	214/238	221/223	HT1	HT4	King	†
7	Kishu mandarin (cv. Kishu)	254/256	218/238	221/223	HT5	HT10	Kishu mandarin	4107.8	4033
8	Kunenbo	256/260	218/238	221/223	HT1	HT5	Kunenbo	†
9	Ponkan (cv. Yoshida)	248/248	234/236	221/221	HT6	HT7	Ponkan	†
10	Sweet orange (cv. Trovita)	248/252	197/234	221/221	HT2	HT3	Sweet orange	†
11	Willowleaf mandarin	248/248	234/236	221/221	HT6	HT7	Willowleaf mandarin	†
12	Murcott	248/260	214/238	221/223	HT1	HT4	Murcott	†
13	Clementine	248/248	234/234	221/221	HT3	HT6	Willowleaf mandarin	†
14	Satsuma mandarin (original tree)	256/260	218/238	221/223	HT1	HT5	Kishu mandarin	1319.7	367.5
15	Satsuma mandarin (cv. Aoshima)	256/260	218/238	221/223	HT1	HT5	Kishu mandarin	1315.6	1795.4
16	Satsuma mandarin (cv. Miyagawa-Wase)	256/260	218/238	221/223	HT1	HT5	Kishu mandarin	352.9	8.2
17	Satsuma mandarin (cv. Miho-Wase)	256/260	218/238	221/223	HT1	HT5	Kishu mandarin	713.3	237.8
18	Satsuma mandarin (cv. Okitsu-Wase)	256/260	218/238	221/223	HT1	HT5	Kishu mandarin	476	0.6
19	Akemi	248/260	234/238	221/223	HT1	HT6	Kishu mandarin	2408	4405.2
20	Amaka	248/260	234/238	221/223	HT1	HT6	Kishu mandarin	795.9	516
21	Amakusa	248/260	234/238	221/223	HT1	HT3 or HT6 #	Kishu mandarin	†
22	Ariake	248/252	197/234	221/221	HT2	HT3 or HT6 #	Sweet orange	†
23	Asuki	248/260	234/238	221/223	HT1	HT6	Kishu mandarin	†
24	Asumi	248/252	197/234	221/221	HT2	HT3	Kishu mandarin	3811.3	4345.8
25	Awa orange	252/272	197/232	221/225	HT2	HT8	Hyuganatsu	†
26	Benibae	248/252	197/234	221/221	HT2	HT6	Kishu mandarin	3920.2	5177.4
27	Ehime Kashi No. 28	248/260	234/238	221/223	HT1	HT3 or HT6 #	Kishu mandarin	†
28	Encore	248/248	214/234	221/221	HT4	HT6	King	†
29	Harehime	252/260	197/238	221/223	HT1	HT2	Kishu mandarin	2.3	0.1
30	Haruhi	260/272	232/238	223/225	HT1	HT8	Kishu mandarin	5147.7	4145.3
31	Harumi	248/252	197/234	221/221	HT2	HT6	Kishu mandarin	7531.8	7889.8
32	Hayaka	248/260	236/238	221/223	HT1	HT7	Kishu mandarin	3233.8	4306.2
33	Kanpei	248/248	234/234	221/221	HT3	HT6	Kishu mandarin	14684.1	10632
34	Kara	248/260	214/238	221/223	HT1	HT4	Kishu mandarin	5430.3	5516.5
35	Kiyomi	252/260	197/238	221/223	HT1	HT2	Kishu mandarin	0	0.2
36	Mihaya	248/248	234/234	221/221	HT6	HT6	Kishu mandarin	6335.6	8553.1
37	Miho-core	248/260	214/238	221/223	HT1	HT4	Kishu mandarin	6.8	1.2
38	Mineola	248/260	234/238	221/223	HT1	HT6	Grapefruit	†
39	Nankou	248/260	234/238	221/223	HT1	HT3 or HT6 #	Kishu mandarin	†
40	Nishinokaori	248/260	234/238	221/223	HT1	HT3	Kishu mandarin	6979.1	6375.2
41	Nou 5 gou	248/256	218/234	221/221	HT5	HT3 or HT6 #	Willowleaf mandarin	†
42	Orland	248/248	234/234	221/221	HT3	HT6	Grapefruit	†
43	Osceola	248/248	234/234	221/221	HT3	HT6	Willowleaf mandarin	†
44	Page	248/260	234/238	221/223	HT1	HT3 or HT6 #	Grapefruit	†
45	Robinson	248/248	234/234	221/221	HT3 or HT6 #	HT3 or HT6 #	Willowleaf mandarin	†
46	Seihou	252/260	197/238	221/223	HT1	HT2	Kishu mandarin	12.3	0.3
47	Seinannohikari	248/260	234/238	221/223	HT1	HT6	King	†
48	Seminole	248/260	234/238	221/223	HT1	HT6	Grapefruit	†
49	Setoka	252/260	197/238	221/223	HT1	HT2	Kishu mandarin	1272.6	219
50	Shiranuhi	248/260	236/238	221/223	HT1	HT7	Kishu mandarin	4192.4	6513.8
51	Sweet Spring	256/260	218/238	221/223	HT1	HT5	Kishu mandarin	1492.3	516.7
52	Tamami	248/252	197/234	221/221	HT2	HT6	Kishu mandarin	3291.6	2752
53	Tsunokagayaki	248/260	214/238	221/223	HT1	HT4	Kishu mandarin	0	1
54	Tsunokaori	252/260	197/238	221/223	HT1	HT2	Kishu mandarin	3.4	2.1
55	Tsunonozomi	248/260	234/238	221/223	HT1	HT6	Kishu mandarin	5131.2	6197
56	Willking	null/248	null/234	null/221	null §	HT6	King	†
57	Youkou	248/260	234/238	221/223	HT1	HT6	Kishu mandarin	3105.9	7939.3
58	E-647	248/252	197/234	221/221	HT2	HT3 or HT6 #	Kishu mandarin	†
59	EnOw21	248/260	234/238	221/223	HT1	HT6	King	†
60	F-202	248/260	234/238	221/223	HT1	HT6	Kishu mandarin	10674.9	N/A
61	G-1082	260/260	238/238	223/223	HT1	HT1	Kishu mandarin	1.5	0.8
62	HF9	252/260	197/238	221/223	HT1	HT2	Kishu mandarin	0	0.6
63	Kuchinotsu No. 18	248/260	214/238	221/223	HT1	HT4	Kishu mandarin	0	0.2
64	Kuchinotsu No. 33	248/260	234/238	221/223	HT1	HT6	Kishu mandarin	7673	8444.2
65	Kuchinotsu No. 44	252/256	197/218	221/221	HT2	HT5	Kishu mandarin	5986.7	8444.2
66	KyOw14	260/260	238/238	223/223	HT1	HT1	Kishu mandarin	2.4	1.1
67	KyOw21	252/260	197/238	221/223	HT1	HT2	Kishu mandarin	0	0.3
68	No. 1011	248/260	234/238	221/223	HT1	HT3 or HT6 #	Kishu mandarin	†
69	No. 1408	248/248	234/234	221/221	HT6	HT6	King	†
70	Okitsu No. 37	248/256	218/224	221/223	HT5	HT9	Kishu mandarin	537	1.8
71	Okitsu No. 45	248/252	197/234	221/221	HT2	HT6	Kishu mandarin	N/A	4900.2
72	Okitsu No. 46	248/260	234/238	221/223	HT1	HT3	Kishu mandarin	639.3	621.8
73	Okitsu No. 52	260/260	238/238	223/223	HT1	HT1	Kishu mandarin	0	1.1
74	Okitsu No. 56	248/256	218/234	221/221	HT5	HT6	Kishu mandarin	4126.6	4739
75	Okitsu No. 63	248/252	197/236	221/221	HT2	HT7	Kishu mandarin	7903	8444.2
76	Okitsu No. 67	256/260	218/238	221/223	HT1	HT5	Kishu mandarin	1673	1657.2
77	Strain 86	248/260	234/238	221/223	HT1	HT6	Kishu mandarin	3742	4941.8
78	Strain 87	260/260	238/238	223/223	HT1	HT1	Kishu mandarin	N/A	1602.2
79	Strain 88	260/260	238/238	223/223	HT1	HT1	Kishu mandarin	N/A	0.1
80	Strain 89	260/260	238/238	223/223	HT1	HT1	Kishu mandarin	N/A	0.1
81	Strain 90	260/260	238/238	223/223	HT1	HT1	Kishu mandarin	0	0
82	Strain 91	248/260	214/238	221/223	HT1	HT4	Kishu mandarin	0	1.5
83	Strain 92	252/260	197/238	221/223	HT1	HT2	Kishu mandarin	6.4	0.5
84	Strain 93	248/252	197/234	221/221	HT2	HT6	Kishu mandarin	1718.7	2512.5
85	Strain 94	248/260	236/238	221/223	HT1	HT7	Kishu mandarin	6075.8	10077.6
	N/A: The number of pollen grains per anther was not avairable because of not flowering.
	†: These varieties/selected strains were used for only pedigree analysis.
	#: Inherited haplotypes could't be determined whether HT3 or HT6, because their parent has HT3 or HT6
	§: A unilateral haplotype at MS-P1 region in ‘Willking’ was estimated to be “null” by pedigree analysis with the genotype of the parents or offspring of ‘Willking’
B Indivisuals in F1 populations
Code	Name	Genotype of 00918-1	Genotype of 00918-2	Genotype of 00918-3	Haplotype 1	Haplotype 2	Cross combination	The number of pollen grains per anther
								2015	2016
1	O46-K_01	248/248	214/234	221/221	HT4	HT3	Okitsu No. 46 × Kara	3021.8	N/A
2	O46-K_02	248/260	214/238	221/223	HT1	HT4	Okitsu No. 46 × Kara	53.0653	7.63889
3	O46-K_03	260/260	238/238	223/223	HT1	HT1	Okitsu No. 46 × Kara	12.1567	0.138889
4	O46-K_04	248/260	234/238	221/223	HT1	HT3	Okitsu No. 46 × Kara	1001.9	46.1111
5	O46-K_05	248/260	214/238	221/223	HT1	HT4	Okitsu No. 46 × Kara	94.2695	769.725
6	O46-K_06	248/260	214/238	221/223	HT1	HT4	Okitsu No. 46 × Kara	1598.26	950.344
7	O46-K_07	248/260	214/238	221/223	HT1	HT4	Okitsu No. 46 × Kara	14.8491	36.9048
8	O46-K_08	260/260	238/238	223/223	HT1	HT1	Okitsu No. 46 × Kara	14.8491	0
9	O46-K_09	260/260	238/238	223/223	HT1	HT1	Okitsu No. 46 × Kara	14.8491	N/A
10	O46-K_10	248/260	214/238	221/223	HT1	HT4	Okitsu No. 46 × Kara	59.3965	14.0278
11	O46-K_11	248/260	214/238	221/223	HT1	HT4	Okitsu No. 46 × Kara	378.082	323.171
12	O46-K_12	248/248	214/234	221/221	HT4	HT3	Okitsu No. 46 × Kara	7112.73	N/A
13	O46-K_13	248/248	214/234	221/221	HT4	HT3	Okitsu No. 46 × Kara	15403.5	13496.2
14	O46-K_14	248/260	214/238	221/223	HT1	HT4	Okitsu No. 46 × Kara	4785.13	N/A
15	O46-K_15	248/248	214/234	221/221	HT4	HT3	Okitsu No. 46 × Kara	13999.4	13384.8
16	O46-K_16	260/260	238/238	223/223	HT1	HT1	Okitsu No. 46 × Kara	52.047	12.5556
17	O46-K_17	248/248	214/234	221/221	HT4	HT3	Okitsu No. 46 × Kara	12869.2	9783.93
18	O46-K_18	248/260	214/238	221/223	HT1	HT4	Okitsu No. 46 × Kara	3235.87	N/A
19	O46-K_19	248/248	214/234	221/221	HT4	HT3	Okitsu No. 46 × Kara	3569.98	3519.24
20	O46-K_20	248/248	214/234	221/221	HT4	HT3	Okitsu No. 46 × Kara	2662.94	1850.31
21	O46-K_21	248/260	234/238	221/223	HT1	HT3	Okitsu No. 46 × Kara	33.4105	28.0556
22	O46-K_22	248/260	234/238	221/223	HT1	HT3	Okitsu No. 46 × Kara	67.811	2.22222
23	O46-K_23	248/260	234/238	221/223	HT1	HT3	Okitsu No. 46 × Kara	39.7745	10.8889
24	O46-K_24	248/260	214/238	221/223	HT1	HT4	Okitsu No. 46 × Kara	84.0723	15.2222
25	O46-K_25	248/260	214/238	221/223	HT1	HT4	Okitsu No. 46 × Kara	1224.81	2311.27
26	O46-K_26	248/248	214/234	221/221	HT4	HT3	Okitsu No. 46 × Kara	3924.13	3737.44
27	O46-K_27	248/248	214/234	221/221	HT4	HT3	Okitsu No. 46 × Kara	3474.7	6424.72
28	O46-K_28	248/260	214/238	221/223	HT1	HT4	Okitsu No. 46 × Kara	42.4575	21.9444
29	O46-K_29	248/260	214/238	221/223	HT1	HT4	Okitsu No. 46 × Kara	76.1387	44.8889
30	O46-K_30	248/260	234/238	221/223	HT1	HT3	Okitsu No. 46 × Kara	300.695	126.444
31	O46-K_31	248/248	214/234	221/221	HT4	HT3	Okitsu No. 46 × Kara	11691.2	9840.03
32	O46-K_32	248/248	214/234	221/221	HT4	HT3	Okitsu No. 46 × Kara	3693.97	4066.19
33	O46-K_33	248/248	214/234	221/221	HT4	HT3	Okitsu No. 46 × Kara	18888.1	11384.3
34	SS-O56_01	248/260	234/238	221/223	HT1	HT6	Sweet Spring × Okitsu No. 56	2791.64	2494.65
35	SS-O56_02	248/256	218/234	221/221	HT5	HT6	Sweet Spring × Okitsu No. 56	6692.01	7701.75
36	SS-O56_03	248/256	218/234	221/221	HT5	HT6	Sweet Spring × Okitsu No. 56	8850.08	5058.6
37	SS-O56_04	248/260	234/238	221/223	HT1	HT6	Sweet Spring × Okitsu No. 56	1441.6	1686.86
38	SS-O56_05	248/256	218/234	221/221	HT5	HT6	Sweet Spring × Okitsu No. 56	5830.76	9236.16
39	SS-O56_06	248/260	234/238	221/223	HT1	HT6	Sweet Spring × Okitsu No. 56	1633.4	2672.84
40	SS-O56_07	248/260	234/238	221/223	HT1	HT6	Sweet Spring × Okitsu No. 56	2610.97	N/A
41	SS-O56_08	248/260	234/238	221/223	HT1	HT6	Sweet Spring × Okitsu No. 56	1770.02	1633.4
42	SS-O56_09	248/260	234/238	221/223	HT1	HT6	Sweet Spring × Okitsu No. 56	2280.83	2019.48
43	SS-O56_10	248/260	234/238	221/223	HT1	HT6	Sweet Spring × Okitsu No. 56	6573.22	8335.31
44	SS-O56_11	256/260	218/238	221/223	HT1	HT5	Sweet Spring × Okitsu No. 56	N/A	649.65
45	SS-O56_12	256/260	218/238	221/223	HT1	HT5	Sweet Spring × Okitsu No. 56	392.59	132.25
46	SS-O56_13	248/260	234/238	221/223	HT1	HT6	Sweet Spring × Okitsu No. 56	2037.3	1348.3
47	SS-O56_14	248/260	234/238	221/223	HT1	HT6	Sweet Spring × Okitsu No. 56	1651.22	3177.71
48	SS-O56_15	256/260	218/238	221/223	HT1	HT5	Sweet Spring × Okitsu No. 56	971.297	629.603
49	SS-O56_16	256/260	218/238	221/223	HT1	HT5	Sweet Spring × Okitsu No. 56	1473.03	501.158
50	SS-O56_17	256/256	218/218	221/221	HT5	HT5	Sweet Spring × Okitsu No. 56	14364.1	15799.5
51	SS-O56_18	248/260	234/238	221/223	HT1	HT6	Sweet Spring × Okitsu No. 56	3326.21	3791.48
52	SS-O56_19	256/260	218/238	221/223	HT1	HT5	Sweet Spring × Okitsu No. 56	315.253	180.19
53	SS-O56_20	256/260	218/238	221/223	HT1	HT5	Sweet Spring × Okitsu No. 56	634.8	326.681
54	SS-O56_21	248/260	234/238	221/223	HT1	HT6	Sweet Spring × Okitsu No. 56	84.5123	5.73333
55	SS-O56_22	256/260	218/238	221/223	HT1	HT5	Sweet Spring × Okitsu No. 56	0.458333	N/A
56	SS-O56_23	256/256	218/218	221/221	HT5	HT5	Sweet Spring × Okitsu No. 56	6711.81	5711.97
57	SS-O56_24	256/256	218/218	221/221	HT5	HT5	Sweet Spring × Okitsu No. 56	4781.42	5593.17
58	SS-O56_25	248/260	234/238	221/223	HT1	HT6	Sweet Spring × Okitsu No. 56	4038.96	N/A
59	SS-O56_26	256/260	218/238	221/223	HT1	HT5	Sweet Spring × Okitsu No. 56	412.063	2.125
60	SS-O56_27	256/256	218/218	221/221	HT5	HT5	Sweet Spring × Okitsu No. 56	6157.44	11968.4
61	SS-O56_28	248/260	234/238	221/223	HT1	HT6	Sweet Spring × Okitsu No. 56	4350.8	3732.08
62	SS-O56_29	256/256	218/218	221/221	HT5	HT5	Sweet Spring × Okitsu No. 56	2655.02	1574.01
63	SS-O56_30	248/260	234/238	221/223	HT1	HT6	Sweet Spring × Okitsu No. 56	5771.36	3082.68
64	SS-O56_31	256/256	218/218	221/221	HT5	HT5	Sweet Spring × Okitsu No. 56	7008.79	3454.9
65	H-O63_01	248/260	236/238	221/223	HT1	HT7	Harehime × Okitsu No. 63	6434.13	4891.96
66	H-O63_02	248/252	197/236	221/221	HT2	HT7	Harehime × Okitsu No. 63	6304.94	5626.17
67	H-O63_03	248/252	197/236	221/221	HT2	HT7	Harehime × Okitsu No. 63	4462.16	N/A
68	H-O63_04	248/252	197/236	221/221	HT2	HT7	Harehime × Okitsu No. 63	9387.95	N/A
69	H-O63_05	248/252	197/236	221/221	HT2	HT7	Harehime × Okitsu No. 63	11813.3	10295.4
70	H-O63_06	248/260	236/238	221/223	HT1	HT7	Harehime × Okitsu No. 63	7078.09	7721.55
71	H-O63_07	252/260	197/238	221/223	HT1	HT2	Harehime × Okitsu No. 63	N/A	10.7333
72	H-O63_08	252/260	197/238	221/223	HT1	HT2	Harehime × Okitsu No. 63	1484.91	6.13333
73	H-O63_09	252/260	197/238	221/223	HT1	HT2	Harehime × Okitsu No. 63	N/A	3.53333
74	H-O63_10	248/252	197/236	221/221	HT2	HT7	Harehime × Okitsu No. 63	2606.02	2286.77
75	H-O63_11	248/260	236/238	221/223	HT1	HT7	Harehime × Okitsu No. 63	7684.43	11549.3
76	H-O63_12	248/252	197/236	221/221	HT2	HT7	Harehime × Okitsu No. 63	4380.49	4227.05
77	H-O63_13	248/252	197/236	221/221	HT2	HT7	Harehime × Okitsu No. 63	3932.55	4636.23
78	H-O63_14	248/252	197/236	221/221	HT2	HT7	Harehime × Okitsu No. 63	7078.09	6962.59
79	H-O63_15	248/252	197/236	221/221	HT2	HT7	Harehime × Okitsu No. 63	3078.72	1895.74
80	H-O63_16	252/252	197/197	221/221	HT2	HT2	Harehime × Okitsu No. 63	1304	1450
81	H-O63_17	248/252	197/236	221/221	HT2	HT7	Harehime × Okitsu No. 63	4801.22	7205.95
82	H-O63_18	252/260	197/238	221/223	HT1	HT2	Harehime × Okitsu No. 63	6.23333	3.33333
83	H-O63_19	252/252	197/197	221/221	HT2	HT2	Harehime × Okitsu No. 63	1129	1640
84	H-O63_20	252/252	197/197	221/221	HT2	HT2	Harehime × Okitsu No. 63	3.43333	2.5
85	H-O63_21	248/260	236/238	221/223	HT1	HT7	Harehime × Okitsu No. 63	8117.53	7721.55
86	H-O63_22	248/252	197/236	221/221	HT2	HT7	Harehime × Okitsu No. 63	1568.07	4281.5
87	H-O63_23	248/260	236/238	221/223	HT1	HT7	Harehime × Okitsu No. 63	10773.9	9510.04
88	H-O63_24	252/260	197/238	221/223	HT1	HT2	Harehime × Okitsu No. 63	8.21667	4.66667
89	H-O63_25	248/252	197/236	221/221	HT2	HT7	Harehime × Okitsu No. 63	N/A	3942.44
90	H-O63_26	248/260	236/238	221/223	HT1	HT7	Harehime × Okitsu No. 63	12044.3	10179.9
	N/A: The number of pollen grains per anther was not avairable because of not flowering.
